# Supplementary material
Source: publisher figshare collection journal article supplement (https://geolsoc.figshare.com/ndownloader/files/20021255)
Supplement: Supplementary file 1 [file 20021255]

Table I. LA-SF-ICP-MS U-Th-Pb dating methodology for basement zircons at CAF, Stellenbosch University
